# Supplementary material for: Cancer Stem Cell Markers in Rhabdomyosarcoma in Children
Source: MDPI journal article supplement (doi:10.3390/diagnostics12081895), 2022-08-04
Supplement: s1 [file s1]

**Suppl. Table S1.** Comparisons of characteristics of T1 and T2 patients.

| Variable           |              | T1             | T2             | P<br>(Fisher test)  |
|--------------------|--------------|----------------|----------------|---------------------|
| Gender             | female       | 6              | 13             | 1.0                 |
|                    | male         | 9              | 21             |                     |
| Histologic subtype | ARMS         | 5              | 14             | 0.7536              |
|                    | ERMS         | 10             | 20             |                     |
| Age                | median (IQR) | 5.1 (2.6, 8.0) | 4.4 (2.3, 9.3) | 0.4099 <sup>b</sup> |

a Fisher's exact test, b Mann-Whitney U test

**Suppl. Table S2.** Comparisons of characteristics of TNM 1+2+3 and TNM 4 patients.

| Variable           |              | TNM 1+2+3      | TNM 4           | p<br>(Fisher test)  |
|--------------------|--------------|----------------|-----------------|---------------------|
| Gender             | female       | 13             | 6               | 0.7671 <sup>a</sup> |
|                    | male         | 19             | 11              |                     |
| Histologic subtype | ARMS         | 8              | 11              | 0.0127 <sup>a</sup> |
|                    | ERMS         | 24             | 6               |                     |
| Age                | median (IQR) | 3.9 (2.2, 6.5) | 8.3 (3.4, 15.5) | 0.0169 <sup>b</sup> |

a Fisher's exact test, b Mann-Whitney U test

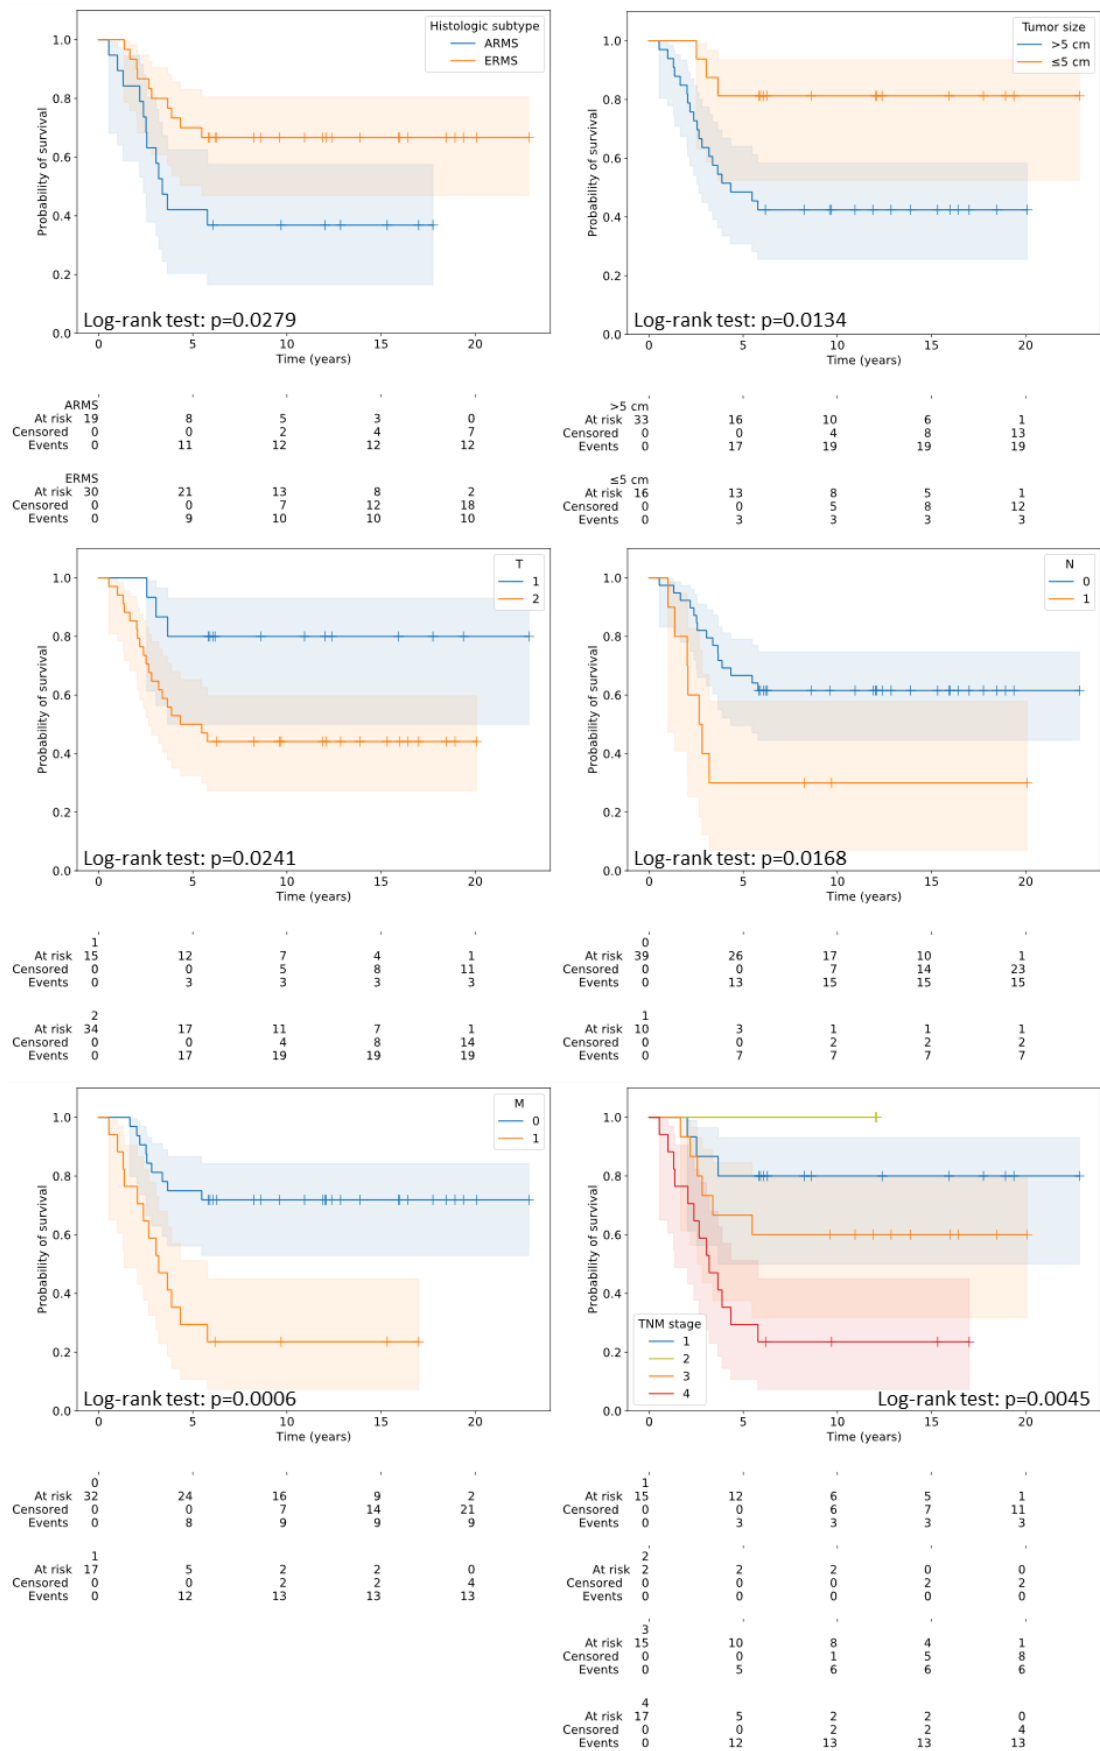

Suppl. Figure S1. Kaplan-Meier curves for significant prognostic predictors.

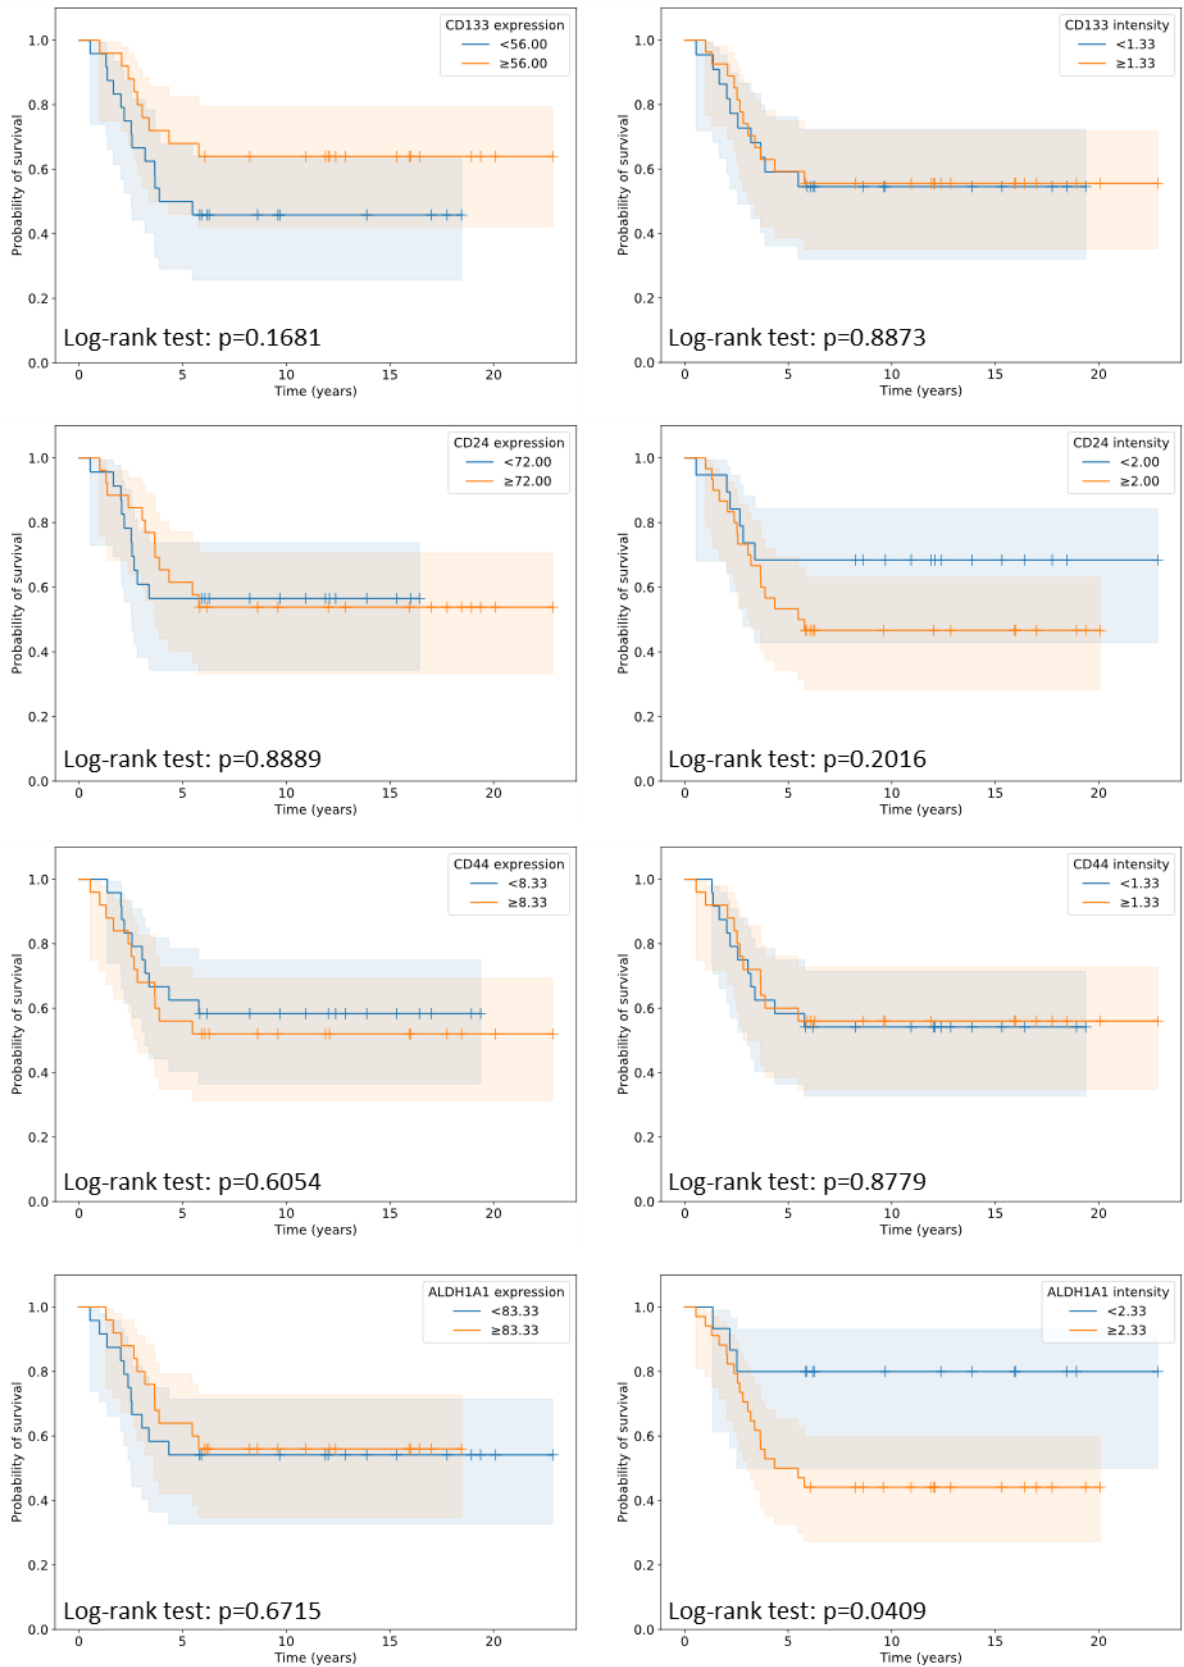

**Suppl. Figure S2.** Kaplan-Meier curves for CSC markers intensity and expression with cut-off set at median.
